# Supplementary material
Source: publisher figshare collection journal article supplement (https://acs.figshare.com/ndownloader/files/5135254)

(1) Top, front and side views of SD152, 60, 128, 1 and 6 on (100), (110) and (111) Pt surfaces.

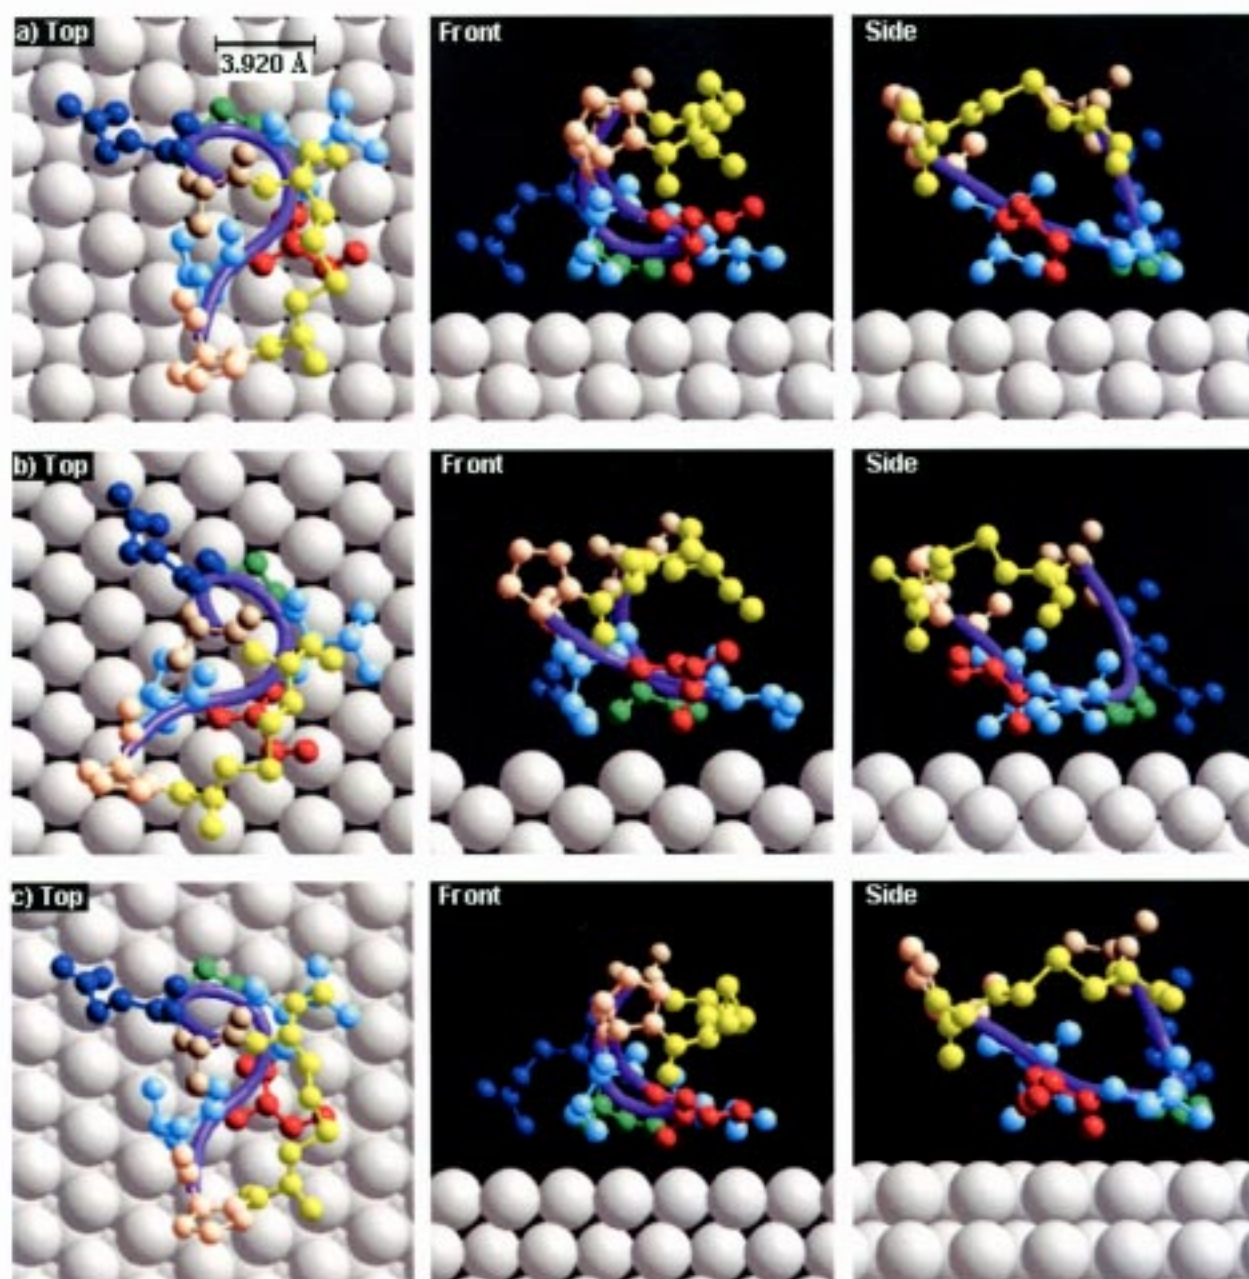

**Figure S1.** Top, front and side views of *SD152* on (a) Pt(100), (b) Pt(110), and (c) Pt(111) surface. The side chains are colored according to **CPTSTGQAC**. The Pt atoms were rendered by overlapping spheres whereas the protein atoms were rendered by balls and cylinders model with the coil representation of the secondary structure of the protein.

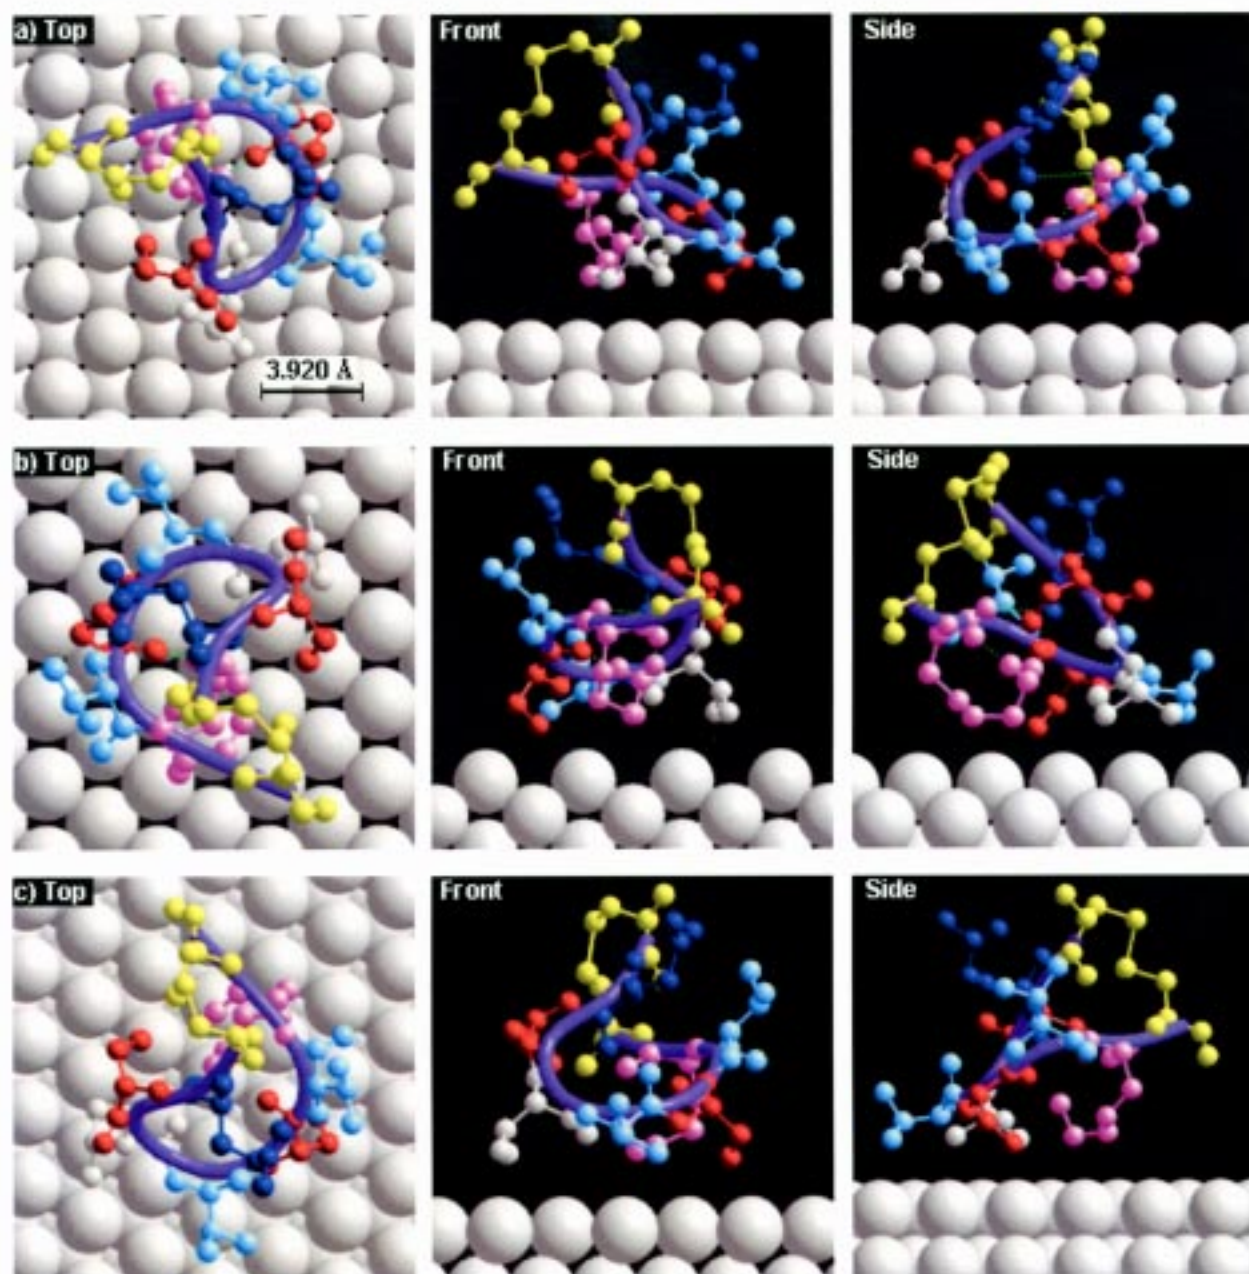

**Figure S2.** Top, front and side views of *SD60* on (a) Pt(100), (b) Pt(110), and (c) Pt(111) surface. The side chains are colored according to **CQSVTSTKC**. The Pt atoms were rendered by overlapping spheres whereas the protein atoms were rendered by balls and cylinders model with the coil representation of the secondary structure of the protein.



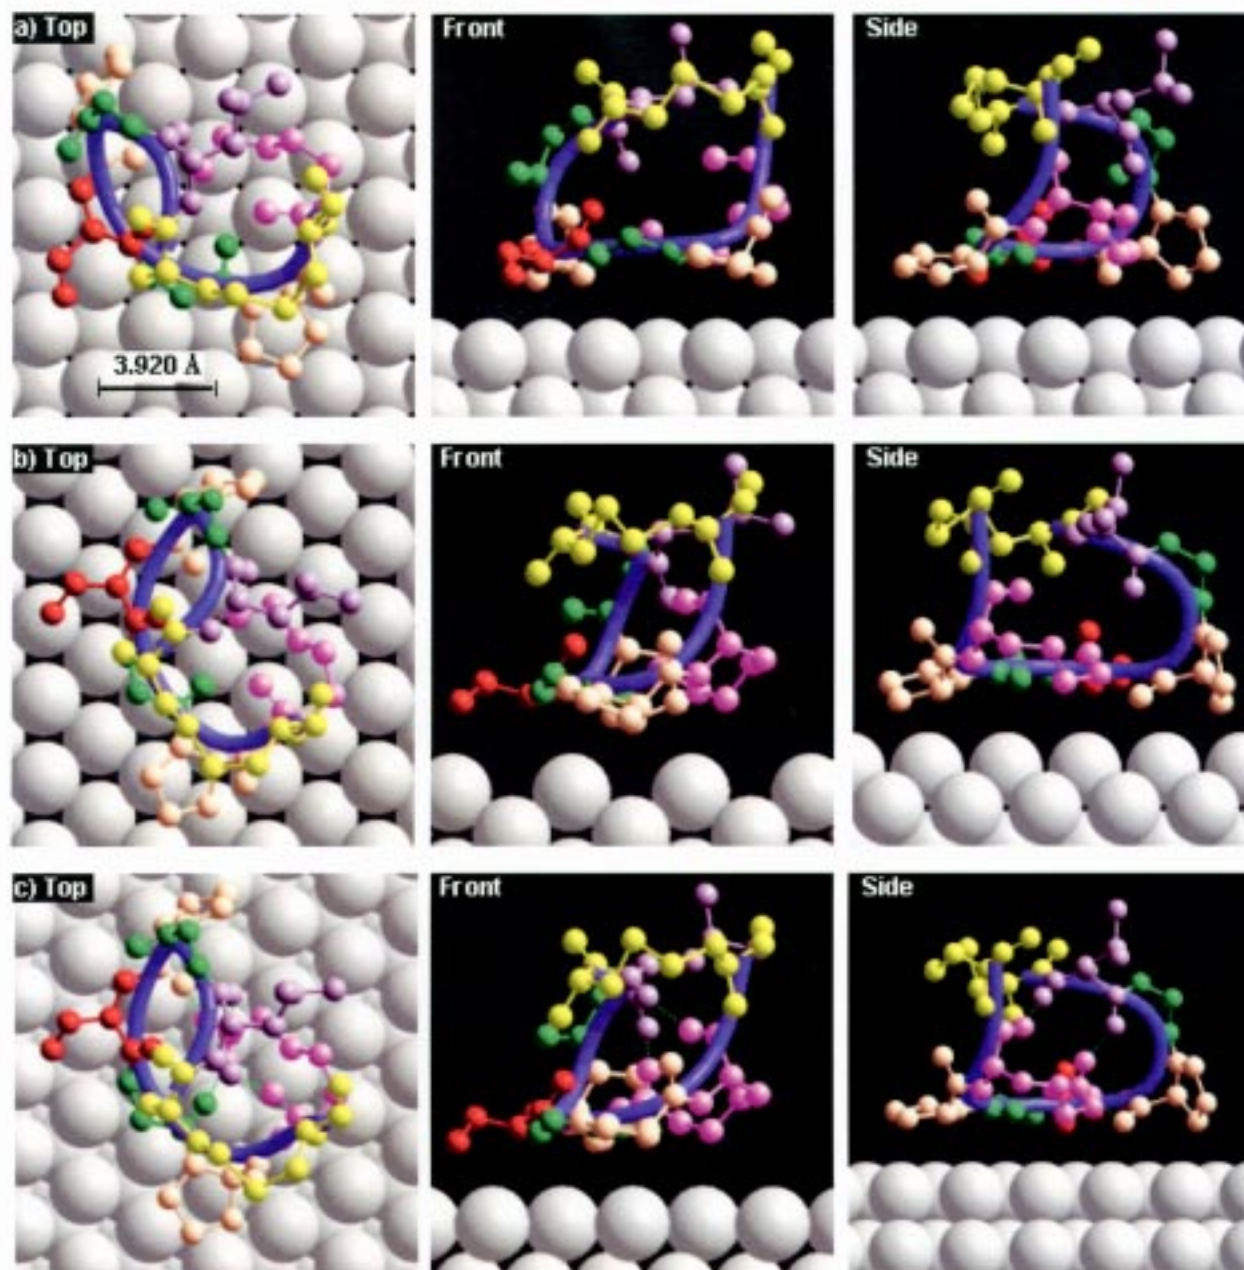

**Figure S3.** Top, front and side views of *SD128* on (a) Pt(100), (b) Pt(110), and (c) Pt(111) surface. The side chains are colored according to **CLGPSGPKC**. The Pt atoms were rendered by overlapping spheres whereas the protein atoms were rendered by balls and cylinders model with the coil representation of the secondary structure of the protein.

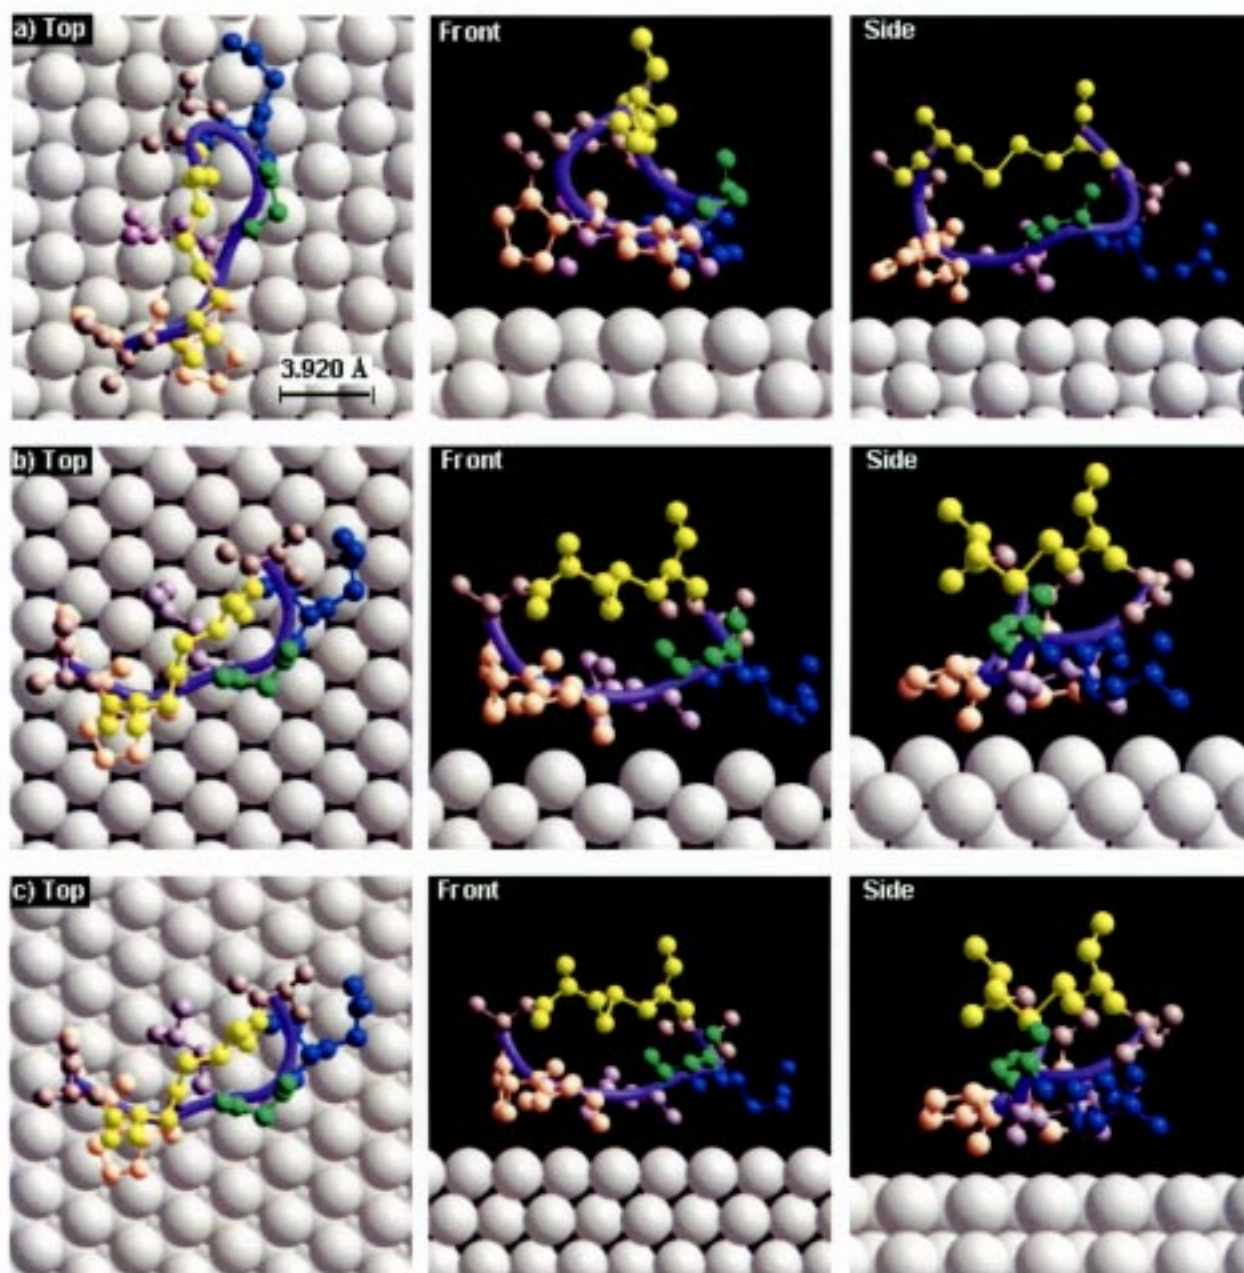

**Figure S4.** Top, front and side views of *SDI* on (a) Pt(100), (b) Pt(110), and (c) Pt(111) surface. The side chains are colored according to **CAPPLGQAC**. The Pt atoms were rendered by overlapping spheres whereas the protein atoms were rendered by balls and cylinders model with the coil representation of the secondary structure of the protein.



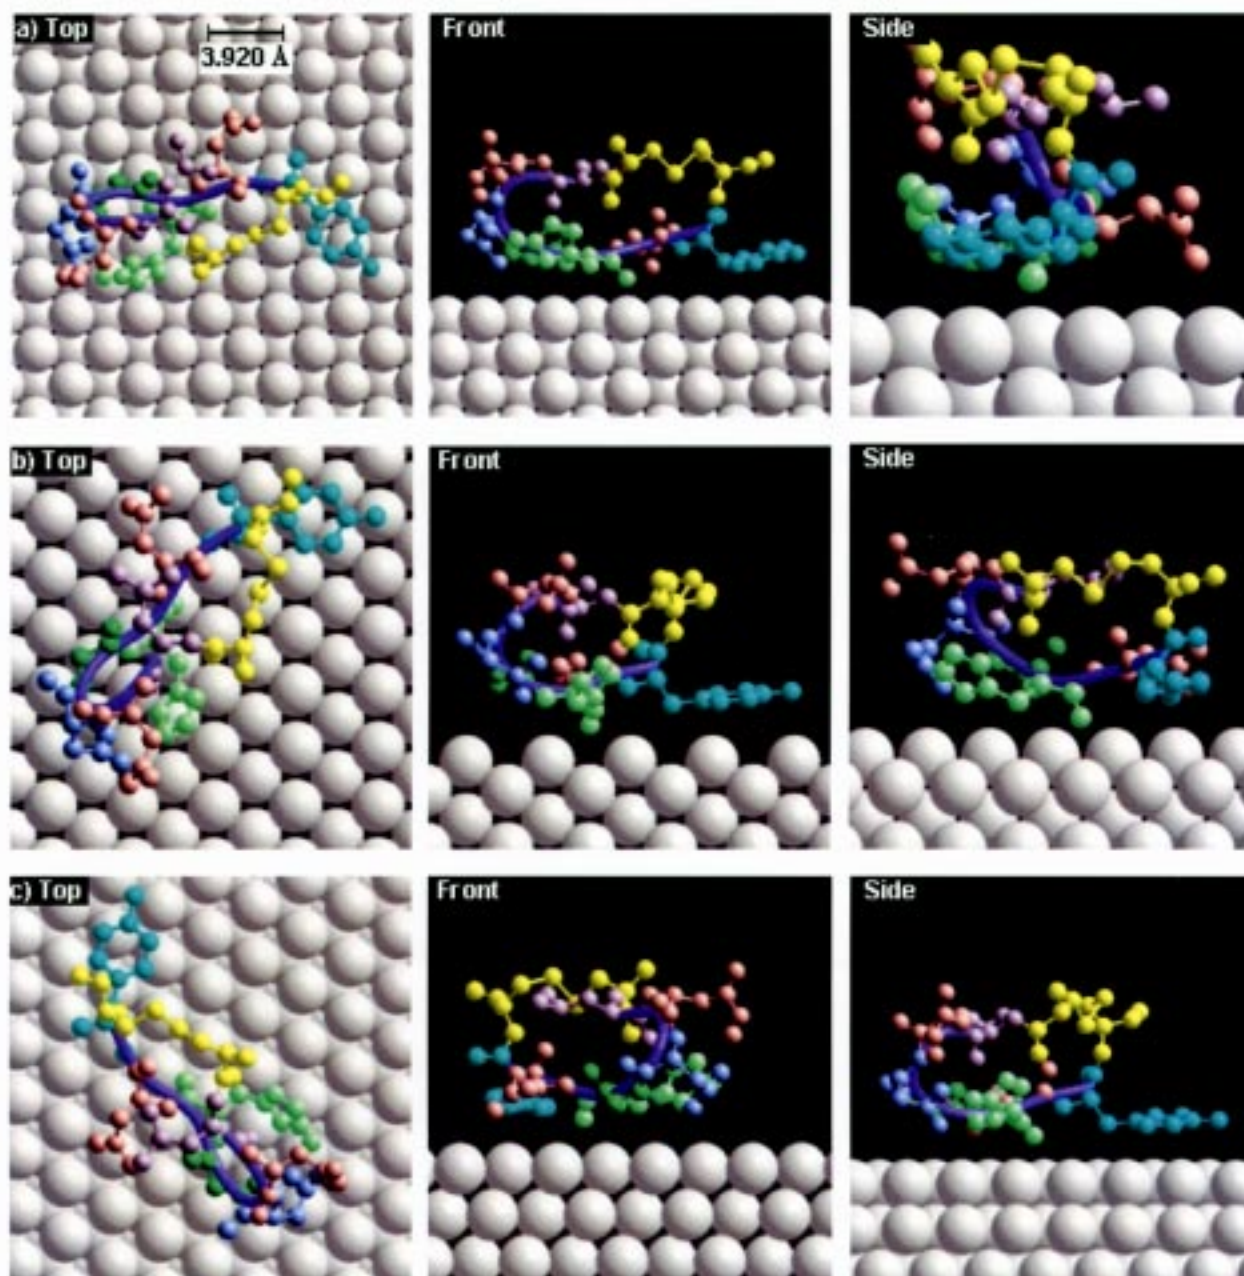

**Figure S5.** Top, front and side views of *SD6* on (a) Pt(100), (b) Pt(110), and (c) Pt(111) surface. The side chains are colored according to **CLNDGHN****YC**. The Pt atoms were rendered by overlapping spheres whereas the protein atoms were rendered by balls and cylinders model with the coil representation of the secondary structure of the protein.

- (2) Detailed list of binding amino acids, groups and atoms that form the polypod molecular architecture on top of (100), (110) and (111) Pt surfaces.

SD152 **CPTSTGQAC** on Pt (100)

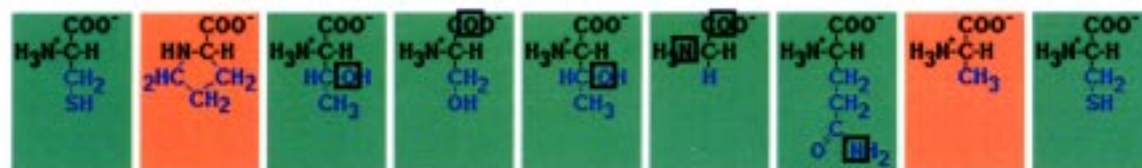

SD152 **CPTSTGQAC** on Pt (110)

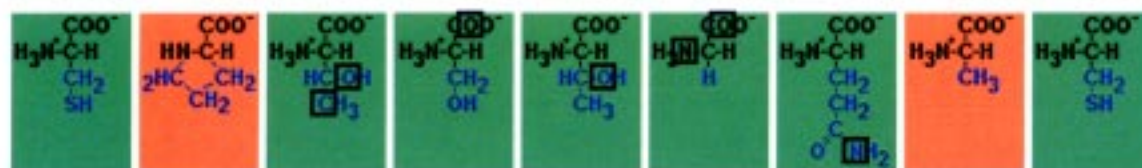

SD152 **CPTSTGQAC** on Pt (111)

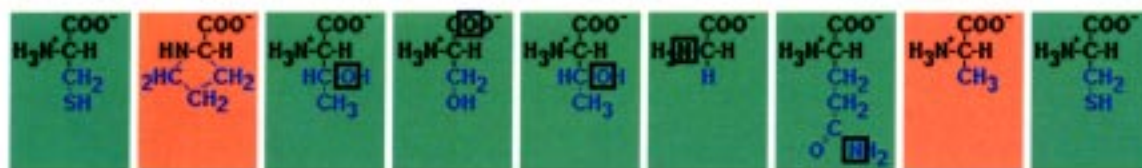

SD60 **CQSVTSTKC** on Pt (100)

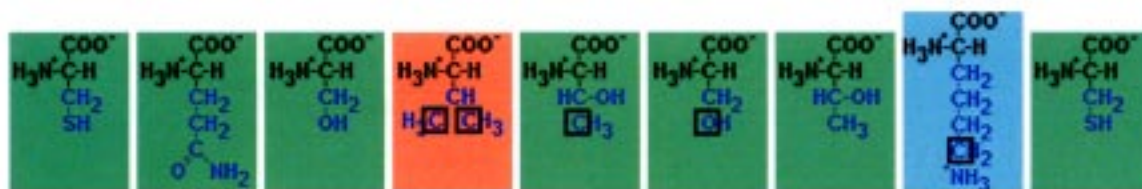

SD60 **CQSVTSTKC** on Pt (110)

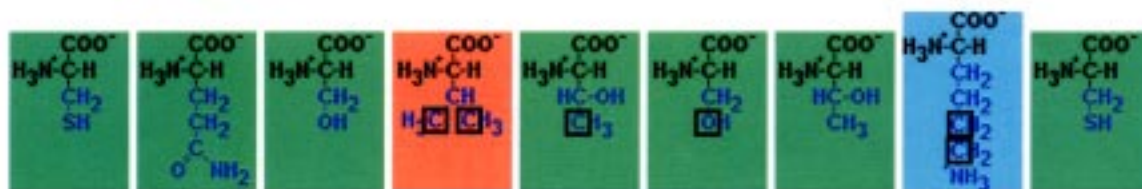

SD60 **CQSVTSTKC** on Pt (111)

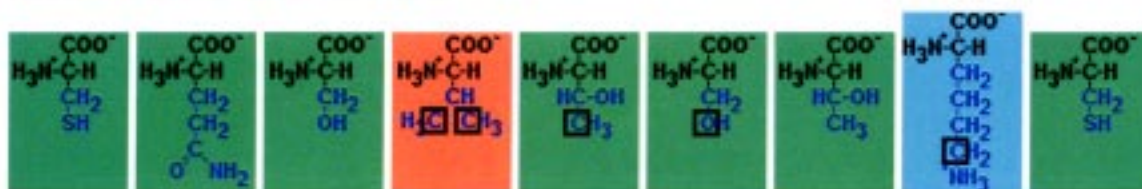



SD128 **CLGPSGPKC** on Pt (100)

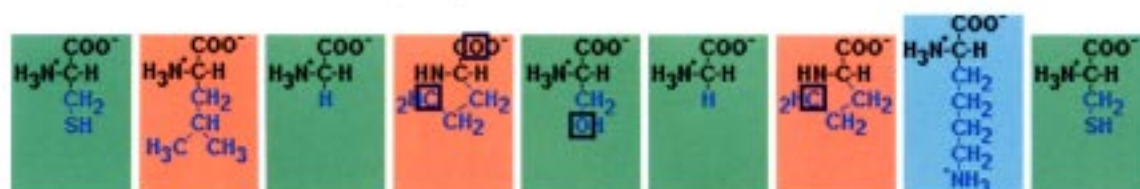

SD128 **CLGPSGPKC** on Pt (110)

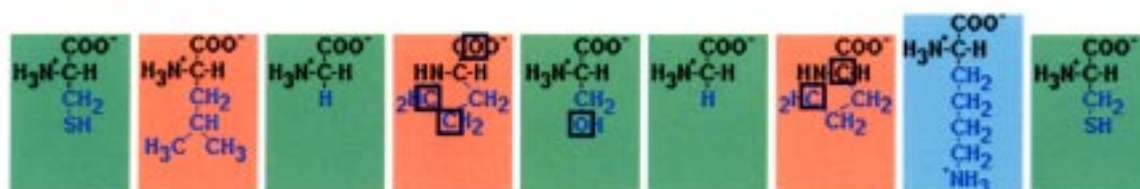

SD128 **CLGPSGPKC** on Pt (111)

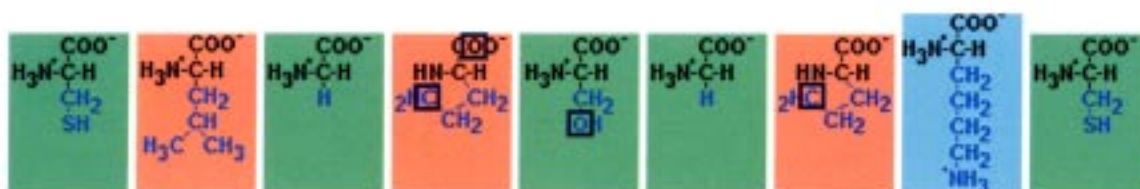

SD1 **CAPPLGQAC** on Pt (100)

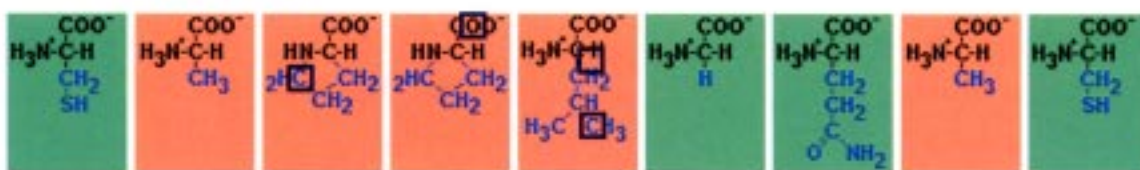

SD1 **CAPPLGQAC** on Pt (110)

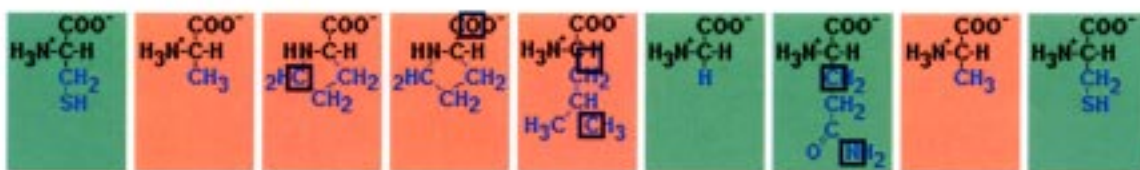

SD1 **CAPPLGQAC** on Pt (111)

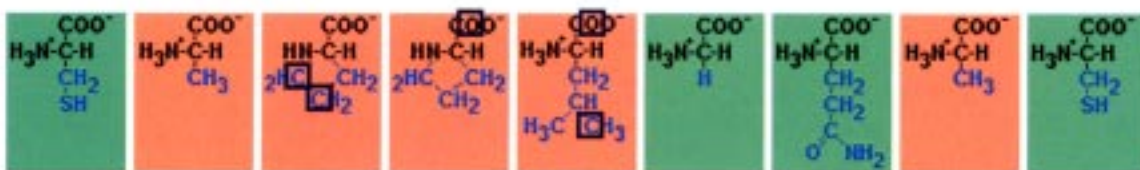

SD6 CLNDGHN<sup>+</sup>YC on Pt (100)

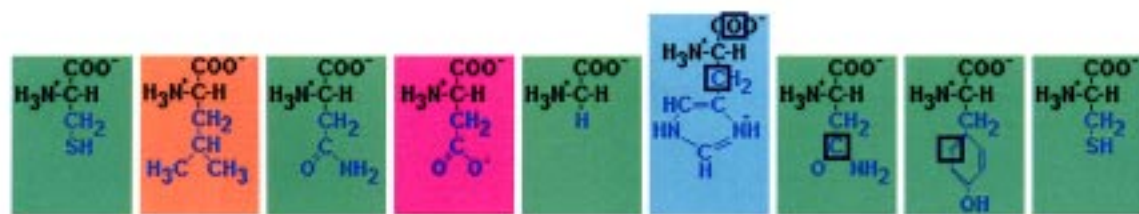

SD6 CLNDGHN<sup>+</sup>YC on Pt (110)

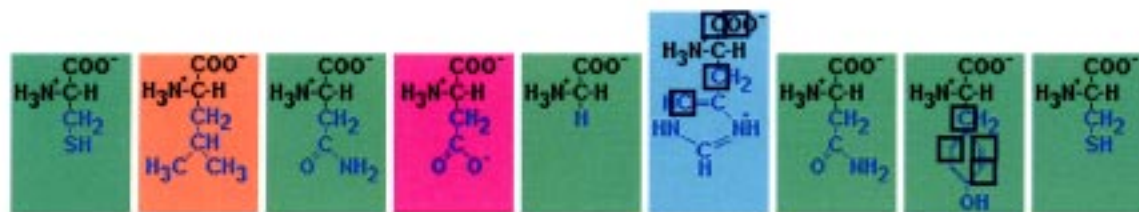

SD6 CLNDGHN<sup>+</sup>YC on Pt (111)

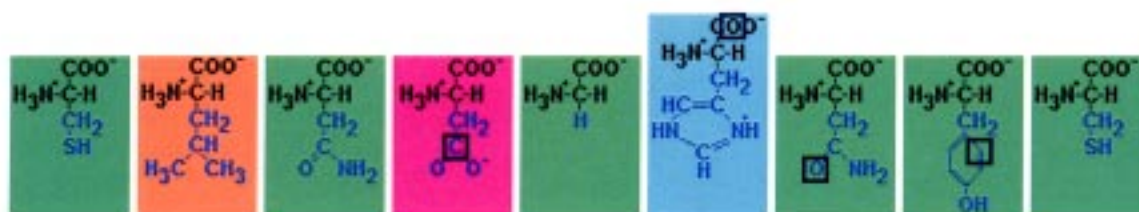

Supplement: Supplementary file 1 [file 5135254]
